# Supplementary material for: In vivo therapeutic effects of affinity-improved-TCR engineered T-cells on HBV-related hepatocellular carcinoma
Source: PubMed Central journal article supplement — J Immunother Cancer. 2020 Dec 15;8(2):e001748. doi: 10.1136/jitc-2020-001748 (PMC7745518; doi:10.1136/jitc-2020-001748), 2020-12-15
Supplement: jitc-2020-001748supp001.pdf [file jitc-2020-001748supp001.pdf]

**Supplementary Material:*****In vivo* therapeutic effects of affinity-improved-TCR engineered T-cells on HBV-related hepatocellular carcinoma**

Qi Liu,<sup>1,2,3</sup> Ye Tian,<sup>1</sup> Yanyan Li,<sup>1</sup> Wei Zhang,<sup>3</sup> Wenxuan Cai,<sup>1</sup> Yaju Liu,<sup>3</sup> Yuefei Ren,<sup>1,4</sup>

Zhaoduan Liang,<sup>1</sup> Peipei Zhou,<sup>1,5</sup> Yajing Zhang,<sup>1,2</sup> Yifeng Bao,<sup>1</sup> Yi Li<sup>1,2,3</sup>

<sup>1</sup>State Key Laboratory of Respiratory Disease, Guangzhou Institutes of Biomedicine and Health, Chinese Academy of Sciences, Guangzhou 510530, China

<sup>2</sup>University of Chinese Academy of Sciences, Beijing 100049, China

<sup>3</sup>Hefei Institute of Stem Cell and Regenerative Medicine, Guangzhou Institutes of Biomedicine and Health, Chinese Academy of Sciences, Hefei 230088, China

<sup>4</sup>School of Life Sciences, University of Science and Technology of China, Hefei 230026, China

<sup>5</sup>Institute of Physical Science and Information Technology, Anhui University, Hefei 230601, China

## Supplementary Figures

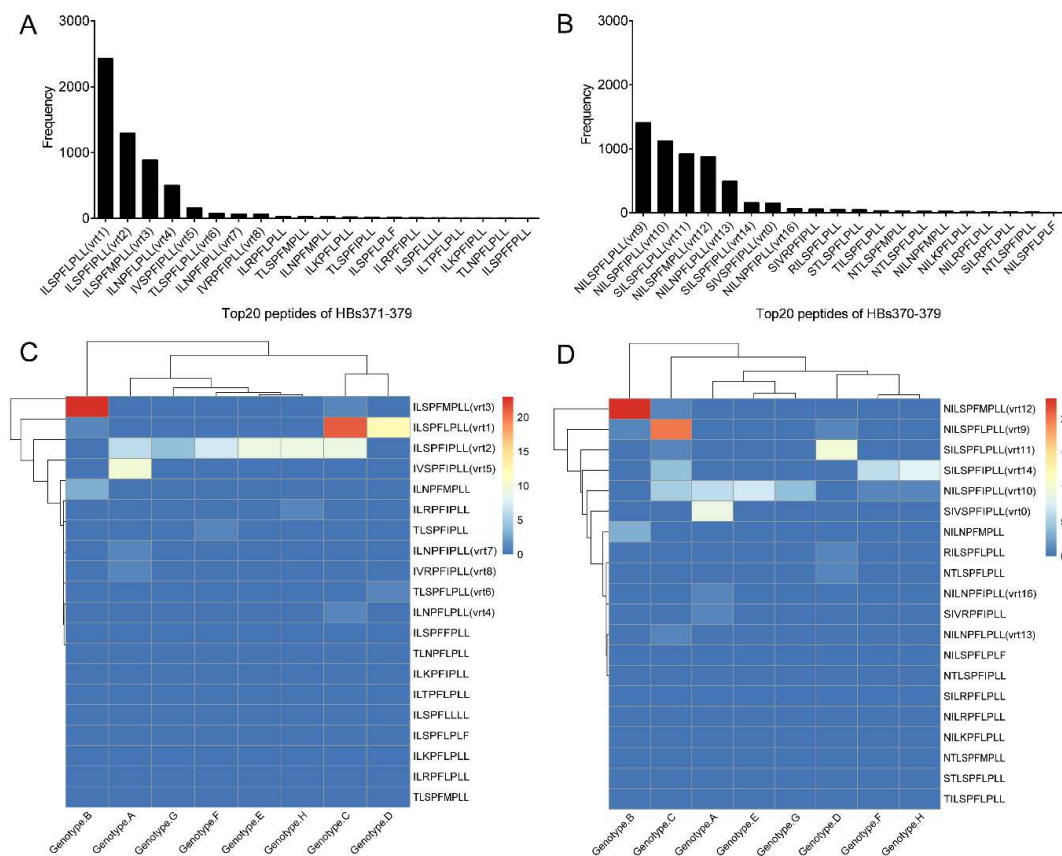

**Supplementary Fig. S1. Analysis of HBs peptides and HBV genotypes.** HBs371-379 epitope sequences (Supplementary Table S1.1) and HBs370-379 epitope sequences (Supplementary Table S1.2) were retrieved from 5855 unique full-length HBs polyproteins. The most common peptides of HBs371 and HBs370 from full-length HBs polyprotein sequences were statistically analyzed with Strawberry Perl 5.26.1.1 and R 3.6.1 according to HBV genotype classified in UniProt. The most common 20 peptides frequency of (A) HBs371-379 and (B) HBs370-379 were retrieved from 5657 (97% of 5855) and 5528 (94% of 5855) full-length HBs polyproteins. (C) The corresponding HBV genotypes of the most common 8 HBs371-379 peptides (vrt1 to vrt8). (D) The corresponding HBV genotypes of the most

common 8 HBs370-379 peptides (vrt0, vrt9 to vrt16).

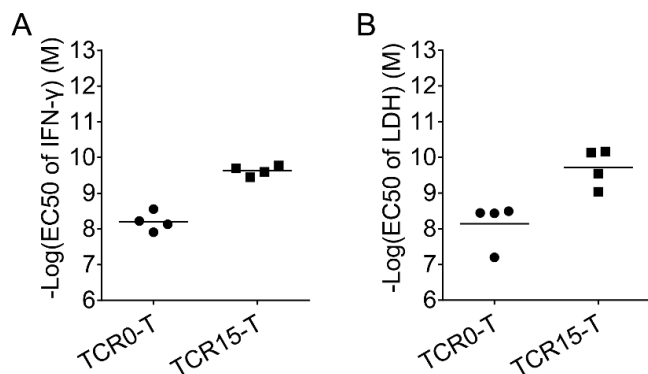

**Supplementary Fig. S2. Analysis of TCR-T activation and detection of cytotoxicity of TCR-T cells.** The  $\text{EC}_{50}$  values are shown for (A) IFN- $\gamma$  ELISPOT and (B) LDH cytotoxicity obtained by titrating exogenous vrt1-HBs371 (ILSPFLPLL) peptide to HLA-A\*02:01-T2 as the antigen-presenting cells. Black lines represent averages of the four batches of TCR-T cells prepared from different PBMC donors.

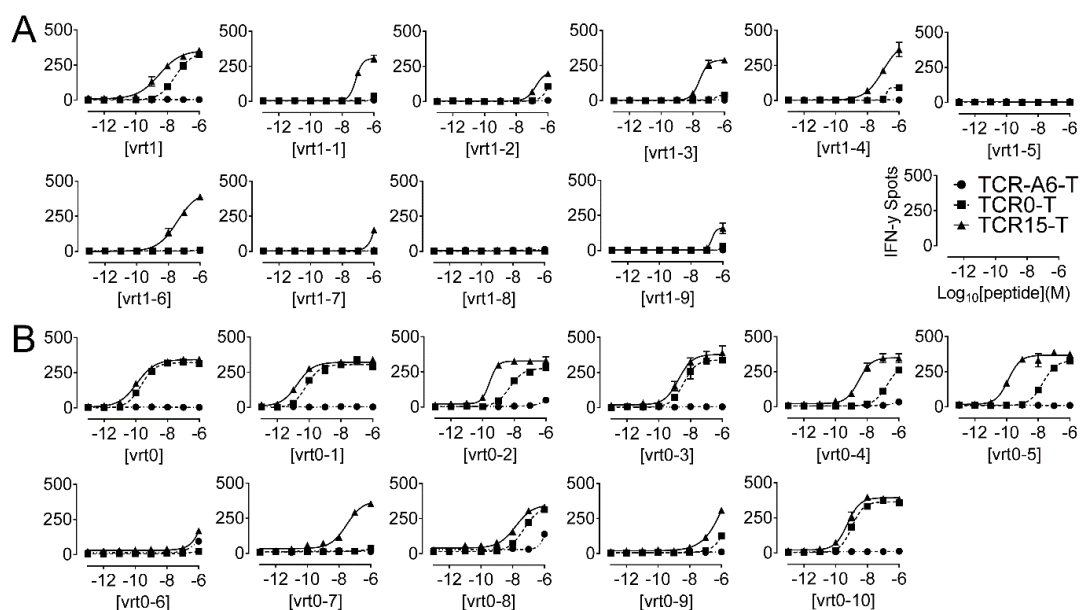

**Supplementary Fig. S3. Determination of the critical residues in vrt1 and vrt0 for TCR recognition by alanine scanning.** After coculturing TCR-T cells and peptide-pulsed T2 cells in triplicate overnight at an E:T ratio of 1:10, IFN- $\gamma$  release was detected. The vrt1 **(A)** and vrt0 **(B)** peptides produced by alanine scanning ( $10^{-6}$  to  $10^{-13}$  M) were analysed.

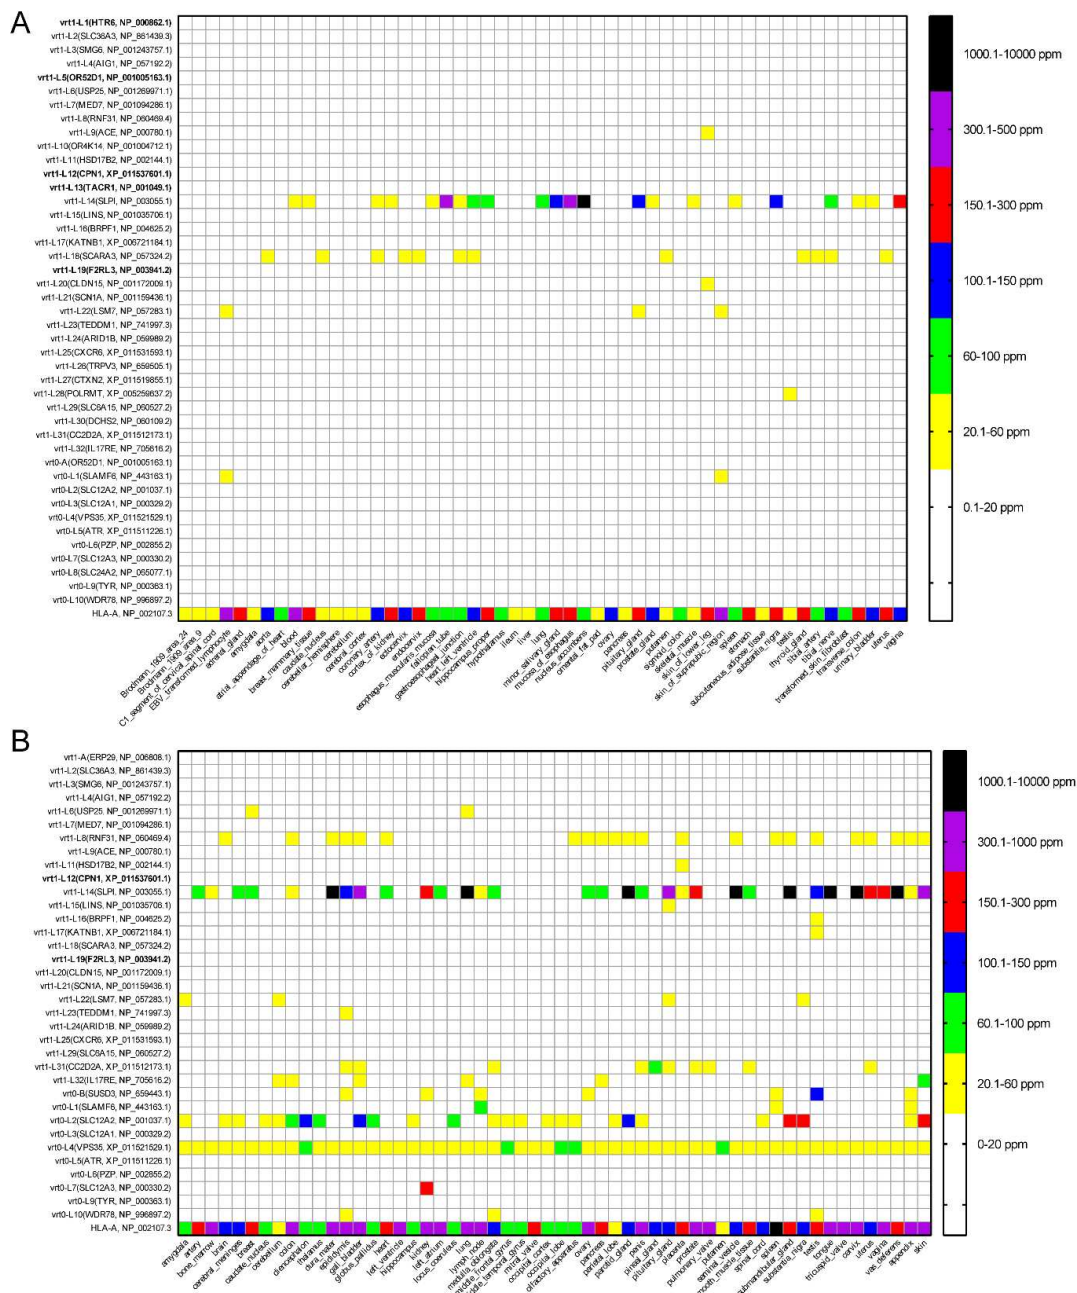

**Supplementary Fig. S4.** Expression profiling of human antigens containing 45 potential cross-reactive peptides related to vrt1 (ILSPFLPLL) and vrt0 (SIVSPFIPLL) from (Supplementary Table S3.2). Two gene expression database *E-MTAB-5214* and *E-MTAB-3358* containing highest number of tissues (53 and 56, respectively) were selected and combined to cover

potential cross-reactive peptides from all 45 polyproteins having expression information. There were 43 peptides presented in *E-MTAB-5214*, and 35 in *E-MTAB-3358*. The expression levels of HLA-A (NP002107.3) from these two database were also extracted to serve as an internal reference normalization. The values are in ppm (ppm - parts per million, so that the sums of all entries in the database for a tissue is equal to 1 million). The heat map was generated with GraphPad Prism version 7. (A) Expression heatmap of potential cross-reactive peptides in *E-MTAB-5214*. (B) Expression heatmap of potential cross-reactive peptides in *E-MTAB-3358*.

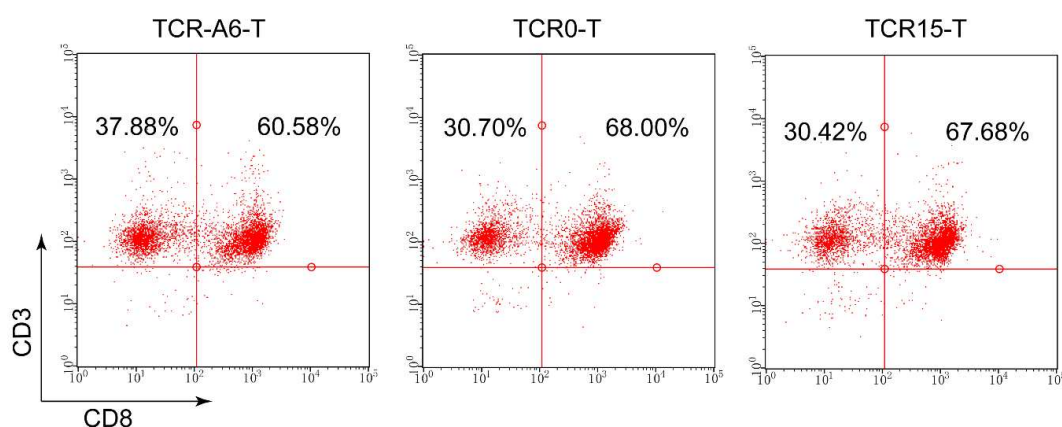

**Supplementary Fig. S5. The CD8<sup>+</sup> cell rates of the human T cells used for the xenograft models prior injecting the mice.**

### Supplementary Tables

**Supplementary Table S1.1** 134 unique HBs371-379 peptides from 5855 unique full-length HBs protein. And the corresponding frequency.

| HBs371-Peptides  | Frequency | HBs371-Peptides | Frequency | HBs371-Peptides | Frequency |
|------------------|-----------|-----------------|-----------|-----------------|-----------|
| ILSPFLPLL (vrt1) | 2426      | TLTPFIPLL       | 3         | ILSPFLPLV       | 1         |
| ILSPFIPLL (vrt2) | 1292      | TLSPFLLLL       | 2         | ILSPFLPTL       | 1         |

|                  |     |            |   |            |   |
|------------------|-----|------------|---|------------|---|
| ILSPFMPLL (vrt3) | 887 | ILSPFIPLS  | 2 | ILSPFLQLL  | 1 |
| ILNPFLPLL (vrt4) | 501 | ILNLFLPLL  | 2 | NLSPFLPLL  | 1 |
| IVSPFIPLL (vrt5) | 160 | NLSPFIPLL  | 2 | ILSSFLLPLL | 1 |
| TLSPFLPLL (vrt6) | 78  | ILSHFLPLL  | 2 | ILNPFTPLL  | 1 |
| ILNPFIPLL (vrt7) | 66  | TLSPYLPLF  | 2 | IMNPFMPLL  | 1 |
| IVRPFIPLL (vrt8) | 62  | ILSPLLPLL  | 2 | TLRPFIPLL  | 1 |
| ILRPFLPLL        | 30  | ILTPFMPLL  | 1 | IVRPFMPLL  | 1 |
| TLSPFMPLL        | 28  | IVNPFIPLL  | 1 | ILTLFIPLL  | 1 |
| ILNPFMPLL        | 24  | ILNLFIPLL  | 1 | FLSPFLPLL  | 1 |
| ILKPFLPLL        | 21  | IGSPFIPLL  | 1 | ILNSFLPLL  | 1 |
| TLSPFIPLL        | 17  | ILSPFMPVL  | 1 | IWSPLLPLL  | 1 |
| ILSPFLPLF        | 13  | TLRPFLLQLL | 1 | TLSPFILLF  | 1 |
| ILRPFIPLL        | 12  | TVSPFIPLL  | 1 | ILNTFLPLL  | 1 |
| ILSPFLLLL        | 10  | TLSPFLPLS  | 1 | NLNPFLPLL  | 1 |
| ILTPFLPLL        | 8   | ILSPFLALL  | 1 | ILSHFLPLF  | 1 |
| ILKPFIPLL        | 8   | ILRPFTPLL  | 1 | TLSPFLTLL  | 1 |
| TLNPFLPLL        | 8   | ILSPFISLL  | 1 | ILSPFITLL  | 1 |
| ILSPFFPLL        | 6   | ILSPFMPLS  | 1 | TVKPFIPLL  | 1 |
| ILSLFIPLL        | 6   | ILNPLIPLL  | 1 | ISRPFIPLL  | 1 |
| ILSPFTPLL        | 6   | IASPFLLPLL | 1 | TVSPFILLL  | 1 |
| IVSPFLPLL        | 6   | IFSPFIPLL  | 1 | ILSPFIPLY  | 1 |
| ISSPFLLPLL       | 5   | TLTPFLPLL  | 1 | TLKPFIPLL  | 1 |
| ILSRFLPLL        | 5   | ILSPYILLL  | 1 | ILSPFLPML  | 1 |
| IVNPFLPLL        | 5   | ILSPFMQLL  | 1 | IWNPFHLHS  | 1 |
| ILSPFLPLS        | 5   | ILSRFIPLL  | 1 | ILSPCMPLL  | 1 |
| ILGPFLPLL        | 5   | ILKHFMPLL  | 1 | ILSPFTLLL  | 1 |
| ILSHFIPLL        | 4   | ILSPFLPPL  | 1 | IWSPFMPLL  | 1 |
| ILSPYLPLL        | 4   | IFSPFLPLL  | 1 | TLTPFMPLL  | 1 |
| IWSPFLPLL        | 4   | ILSPFIQLL  | 1 | TVSPFLPLL  | 1 |
| ILSPFSPLL        | 4   | ILIPFLPLL  | 1 | TLSPFTPLL  | 1 |
| TLKPFLPLL        | 4   | ILSLFMPLL  | 1 | ILSPFIPLI  | 1 |
| IVKPFIPLL        | 4   | IWSRFIPLL  | 1 | ILMPFLPLL  | 1 |
| ILSPFILLL        | 3   | ILNPFMPPL  | 1 | IMSPVVPLL  | 1 |
| IVRPFLPLL        | 3   | IVRHFIPLL  | 1 | ILSPCTPLL  | 1 |
| ILSPFMSLL        | 3   | IMSPFLPLL  | 1 | ILSPYMPLL  | 1 |
| TLSPFLLLF        | 3   | ILSPFMPLF  | 1 | ILSPSLPLL  | 1 |
| ISSPFIPLL        | 3   | ILSPFLTLL  | 1 | ILSSFMPPLL | 1 |
| ILTPFIPLL        | 3   | ILSPLMPLL  | 1 | ILSPFLPRL  | 1 |
| ILNPFLPLF        | 3   | ILNPFFFPLL | 1 | ILNPYIQLL  | 1 |
| TLRPFLPLL        | 3   | IWSPFIPLL  | 1 | TLNPFIPLL  | 1 |
| ILSPFIPLF        | 3   | ILNPFLPQL  | 1 | ILNHFLPLL  | 1 |
| ILRPFMPLL        | 3   | ILSPFIPVL  | 1 | TLSPFIQLL  | 1 |
| IVKPFLPLL        | 3   | ILSPFMLLL  | 1 |            |   |

**Supplementary Table S1.2** 190 unique HBs370-379 peptides from 5855 unique full-length

HBs protein. And the corresponding frequency.

| HBs370-Peptides     | Frequency | HBs370-Peptides | Frequency | HBs370-Peptides | Frequency |
|---------------------|-----------|-----------------|-----------|-----------------|-----------|
| NILSPFLPLL (vrt9)   | 1410      | NTLSPFLLLF      | 2         | NILSPLMPLL      | 1         |
| NILSPFIPLL (vrt10)  | 1125      | NILNLFLPLL      | 2         | NILNPFIFPLL     | 1         |
| SILSPFLPLL (vrt11)  | 921       | NILTPFIPLL      | 2         | SIWSPFIPLL      | 1         |
| NILSPFMPLL (vrt12)  | 874       | SIVRPFLPLL      | 2         | SIVKPFLLPLL     | 1         |
| NILNPFLPLL (vrt13)  | 491       | SNLSPFIPLL      | 2         | NILNPFLPQL      | 1         |
| SILSPFIPLL (vrt14)  | 158       | STLSPYLPLF      | 2         | HILNPFLPLL      | 1         |
| SIVSPFIPLL (vrt0)   | 151       | NILSPFIPLF      | 2         | SILSPFIPVL      | 1         |
| NILNPFIFPLL (vrt16) | 63        | NIVSPFLPLL      | 2         | TTLSPFIPLL      | 1         |
| SIVRPFIPLL          | 59        | SILSPLLPLL      | 2         | NILSPFMLLL      | 1         |
| RILSPFLPLL          | 51        | IILSPFLPLL      | 2         | NTLRPFLPLL      | 1         |
| STLSPFLPLL          | 48        | DILSPFMPLL      | 2         | NILSPFLPLV      | 1         |
| TILSPFLPLL          | 32        | RTLSPFLPLL      | 2         | NILSPFLPTL      | 1         |
| NTLSPFMPLL          | 28        | SILSHFIPLL      | 2         | NILSPFLQLL      | 1         |
| NTLSPFLPLL          | 24        | SILSPFSPLL      | 2         | SNLSPFLPLL      | 1         |
| NILNPFMPLL          | 24        | NIVKPFLLPLL     | 2         | SIVKPFIFPLL     | 1         |
| NILKPFLLPLL         | 20        | NILTPFMPLL      | 1         | NILSSFLLPLL     | 1         |
| NILRPFLPLL          | 16        | SIVNPFIFPLL     | 1         | NILNPFTPLL      | 1         |
| SILRPFLPLL          | 13        | NIVRPFLPLL      | 1         | NIMNPFMPLL      | 1         |
| NTLSPFIPLL          | 12        | NILNLFIFPLL     | 1         | RILSPFSPLL      | 1         |
| NILSPFLPLF          | 8         | SIGSPFIPLL      | 1         | STLRPFIFPLL     | 1         |
| NILKPFIFPLL         | 8         | RISSPFLPLL      | 1         | NIVRPFMPLL      | 1         |
| TILSPFMPLL          | 8         | TILNPFLPLL      | 1         | NILTLFIFPLL     | 1         |
| NTLNPFLPLL          | 8         | RIVSPFIPLL      | 1         | RFLSPFLPLL      | 1         |
| SILNPFLPLL          | 7         | NILSPFMVPL      | 1         | NILNSFLPLL      | 1         |
| NIVSPFIPLL          | 7         | NTLRPFLQLL      | 1         | SILTPFIPLL      | 1         |
| NILSPFFPLL          | 6         | STVSPFIPLL      | 1         | TIWSPLLPLL      | 1         |
| NILRPFIPLL          | 6         | STLSPFLPLS      | 1         | RTLSPFILLF      | 1         |
| NILSPFTPLL          | 6         | NILSPFSPLL      | 1         | NILNTFLPLL      | 1         |
| SILRPFIPLL          | 6         | SILSPFLALL      | 1         | NNLNPFLPLL      | 1         |
| SILSPFLLLL          | 5         | HTLSPFLPLL      | 1         | DILSPFLPLL      | 1         |
| SILSPFLPLF          | 5         | SILSLFIFPLL     | 1         | NILSHFLPLF      | 1         |
| RILSPFIPLL          | 5         | TILKPFLLPLL     | 1         | STLSPFLTLL      | 1         |
| NILSLFIFPLL         | 5         | NILRPFTPLL      | 1         | NILSPFITLL      | 1         |
| RILSPFLLLL          | 5         | RILRPFLPLL      | 1         | TILSPYLPLL      | 1         |
| NIVNPFLPLL          | 5         | NILSPFISLL      | 1         | STVKPFIFPLL     | 1         |



|            |   |            |   |             |   |
|------------|---|------------|---|-------------|---|
| NILTPFLPLL | 5 | NILSPFMPLS | 1 | SISRPFIPLL  | 1 |
| NILSPFLPLS | 5 | NILSHFLPLL | 1 | STVSPFILLL  | 1 |
| NILGPFLPLL | 5 | SILSPFILLL | 1 | NILSPFIPLY  | 1 |
| PILSPFLPLL | 4 | TIVSPFIPLL | 1 | NTLKPFIPLL  | 1 |
| HILSPFLPLL | 4 | NILNPLIPLL | 1 | SILSPFLPML  | 1 |
| TILSPFIPLL | 4 | NIASPFLPLL | 1 | NIWNPFLHLS  | 1 |
| SIVSPFLPLL | 4 | NIFSPFIPLL | 1 | NILSPCMPLL  | 1 |
| STLSPFIPLL | 4 | STLTPFLPLL | 1 | NILSPFTLLL  | 1 |
| NISSPFLPLL | 4 | SILSPYILLL | 1 | NIWSPFMPLL  | 1 |
| SILSPFMPLL | 3 | STLRPFLPLL | 1 | NLTPFMPLL   | 1 |
| SILTPFLPLL | 3 | NILSPFMQLL | 1 | STVSPFLPLL  | 1 |
| NILSPFMSSL | 3 | NILSRFIPLL | 1 | RTLSPFLLLF  | 1 |
| SILSPYLPLL | 3 | NILKHFMPLL | 1 | TLSPFITPLL  | 1 |
| NIWSPFLPLL | 3 | SILSHFLPLL | 1 | CILSPFLPLL  | 1 |
| NISSPFIPLL | 3 | NILSPFLPPL | 1 | NILSPFIPLI  | 1 |
| SILNPFIPLL | 3 | HIFSPFLPLL | 1 | SIWSPFLPLL  | 1 |
| NILNPFLPLF | 3 | NILSPFIQLL | 1 | SILMPFLPLL  | 1 |
| SILSRFLPLL | 3 | NILIPFLPLL | 1 | SIMSPVVPLL  | 1 |
| NIVRPFIPLL | 3 | TTLRPFLPLL | 1 | HILSPCTPLL  | 1 |
| NILRPFMPLL | 3 | NILSLFMPLL | 1 | NILSPYMPLL  | 1 |
| TTLSPFLPLL | 3 | NIWSRFIPLL | 1 | NILSPSLPLL  | 1 |
| NIVKPFIPLL | 3 | DILNPFLPLL | 1 | NILSSFMPPLL | 1 |
| NTLKPFLPLL | 3 | NILNPFMPPL | 1 | NILSPFLPRL  | 1 |
| NLTPFIPLL  | 3 | SIVRHFIPLL | 1 | NILNPYIQLL  | 1 |
| NILSHFIPLL | 2 | NIMSPFLPLL | 1 | NLNPFIPLL   | 1 |
| STLSPFLLLL | 2 | NILSPFMPLF | 1 | SILNHFLPLL  | 1 |
| NILSPFILLL | 2 | SILSPFIPLF | 1 | NLSPFIQLL   | 1 |
| NILSRFLPLL | 2 | TTLKPFLPLL | 1 |             |   |
| NILSPFIPLS | 2 | SILSPFLTLL | 1 |             |   |

**Supplementary Table S2.** pHLA used for testing the specificity of TCR0 (WT) and TCR15<sup>a</sup>

| HLA   | Peptide    | Derived from | TCR0 binding | TCR15 binding |
|-------|------------|--------------|--------------|---------------|
| A0201 | ILSPFLPLL  | HBs          | 3.4μM        | 0.46μM        |
| A0201 | SLLMWITQC  | NY-ESO-1     | NB           | NB            |
| A0201 | VLDFAPPGA  | WT1          | NB           | NB            |
| A0201 | LLMPLLSVI  | MAGE-B4      | NB           | NB            |
| A0201 | AASDNVSTV  | SAGE1        | NB           | NB            |
| A0201 | LLMPLLGVI  | MAGE-B2      | NB           | NB            |
| A0201 | GIYDGILHSI | MAGEB6       | NB           | NB            |
| A0201 | FIWRAISI   | CX048        | NB           | NB            |
| A0201 | RLTEVIASII | TERT         | NB           | NB            |

|       |              |         |    |    |
|-------|--------------|---------|----|----|
| A0201 | LMSVYVVEL    | TERT    | NB | NB |
| A0201 | SVYDFVWL     | TYRP2   | NB | NB |
| A0201 | GLYDGMHL     | MAGEA10 | NB | NB |
| A0201 | KVTDLVQFL    | MAGEA10 | NB | NB |
| A0201 | LMSVYVVELL   | TERT    | NB | NB |
| A0201 | YTWDFGDSSGTL | PMEL    | NB | NB |
| A0201 | ILTIRLTAA    | CTG1B   | NB | NB |
| A0201 | ALLPSLSHC    | K9MRS9  | NB | NB |
| A0201 | FLNGTGGQTHL  | TYRP1   | NB | NB |
| A1101 | SVFGEPWKLITK | MAGE-B2 | NB | NB |
| A2401 | LYATVTQNV    | SAGE1   | NB | NB |

a. Shown are the biochemical affinities, as determined by ProteOn analysis. NB, none binding.

**Supplementary Table S3.1** vrt1 (ILSPFLPLL) and vrt0 (SIVSPFIPLL) alanine scanning peptides

| <b>vrt1</b> | <b>ILSPFLPLL</b>    | <b>vrt0</b> | <b>SIVSPFIPLL</b>    |
|-------------|---------------------|-------------|----------------------|
|             |                     | vrt0-1      | <b>A</b> IVSPFIPLL   |
| vrt1-1      | <b>A</b> LSPFLPLL   | vrt0-2      | S <b>A</b> VSPFIPLL  |
| vrt1-2      | I <b>A</b> SPFLPLL  | vrt0-3      | SI <b>A</b> SPFIPLL  |
| vrt1-3      | IL <b>A</b> PFLPLL  | vrt0-4      | SIV <b>A</b> PFIPLL  |
| vrt1-4      | ILS <b>A</b> FLPLL  | vrt0-5      | SIVS <b>A</b> FIPPLL |
| vrt1-5      | ILSP <b>A</b> LPLL  | vrt0-6      | SIVSP <b>A</b> IPLL  |
| vrt1-6      | ILSPF <b>A</b> PPLL | vrt0-7      | SIVSPF <b>A</b> PPLL |
| vrt1-7      | ILSPFL <b>A</b> LL  | vrt0-8      | SIVSPFI <b>A</b> LL  |
| vrt1-8      | ILSPFLP <b>A</b> L  | vrt0-9      | SIVSPFIP <b>A</b> L  |
| vrt1-9      | ILSPFLPL <b>A</b>   | vrt0-10     | SIVSPFIPL <b>A</b>   |

**Supplementary Table S3.2** vrt1 (ILSPFLPLL) and vrt0 (SIVSPFIPLL) potential cross-reactive human peptides

| <b>vrt1: ILSPFLPLL</b>               |                                     |                                      | <b>vrt0: SIVSPFIPLL</b>              |                                            |                                               |
|--------------------------------------|-------------------------------------|--------------------------------------|--------------------------------------|--------------------------------------------|-----------------------------------------------|
| <i>2 mismatch aa</i>                 |                                     | <i>3 mismatch aa fix F5 &amp; L8</i> |                                      | <i>2 mismatch and 3 mismatch aa</i>        |                                               |
| vrt1-A                               | <b>F</b> LSP <b>L</b> LPLL          | vrt1-L16                             | <b>Q</b> L <b>T</b> PFLILL           | vrt0-A                                     | <b>A</b> IVSPFI <b>F</b> LL                   |
| <i>3 mismatch aa fix F5 &amp; L8</i> |                                     | vrt1-L17                             | IL <b>Q</b> RFLPLI                   | vrt0-B                                     | SIVS <b>C</b> A <b>I</b> ILL                  |
| vrt1-L1                              | <b>A</b> L <b>S</b> FLPLL           | vrt1-L18                             | IL <b>Y</b> LFLALL                   | <i>4 mismatch aa &amp; fix F6 &amp; L9</i> |                                               |
| vrt1-L2                              | I <b>I</b> L <b>P</b> FIILL         | vrt1-L19                             | <b>L</b> L <b>G</b> CFLPLL           | vrt0-L1                                    | <b>C</b> IV <b>F</b> GFIILL                   |
| vrt1-L3                              | <b>L</b> L <b>S</b> G <b>F</b> VPLL | vrt1-L20                             | IL <b>L</b> G <b>F</b> L <b>G</b> LL | vrt0-L2                                    | <b>S</b> M <b>V</b> S <b>G</b> F <b>T</b> PLI |

|         |                    |         |                    |         |                    |
|---------|--------------------|---------|--------------------|---------|--------------------|
| vr1-L4  | I <b>LMN</b> FLYLL | vr1-L21 | IL <b>TPFN</b> PLR | vr0-L3  | <b>SMVSGFG</b> PLI |
| vr1-L5  | I <b>VSPFI</b> FL  | vr1-L22 | IL <b>KGF</b> DPLL | vr0-L4  | <b>SLVGRFI</b> HLL |
| vr1-L6  | <b>FIV</b> PFLPLL  | vr1-L23 | IL <b>VV</b> FLLLL | vr0-L5  | <b>SCVSGFF</b> ILL |
| vr1-L7  | IL <b>IN</b> FLDLL | vr1-L24 | <b>QLSGF</b> LELL  | vr0-L6  | <b>KMVSGFI</b> PLK |
| vr1-L8  | <b>QLSEF</b> DPLL  | vr1-L25 | <b>TLGFF</b> LPLL  | vr0-L7  | <b>SMVSGFA</b> PLI |
| vr1-L9  | <b>MLS</b> YFKPLL  | vr1-L26 | IL <b>SV</b> FLYLF | vr0-L8  | <b>AIVLL</b> FIMLL |
| vr1-L10 | <b>SLSCF</b> LLLL  | vr1-L27 | IL <b>CI</b> FLGLL | vr0-L9  | <b>SYMVP</b> FIPLY |
| vr1-L11 | IL <b>SPFW</b> GLI | vr1-L28 | <b>SLY</b> PFLCLL  | vr0-L10 | <b>RIRSI</b> FIWLL |
| vr1-L12 | <b>LLSV</b> FLHLL  | vr1-L29 | <b>MLE</b> PFLILL  |         |                    |
| vr1-L13 | <b>VLI</b> YFLPLL  | vr1-L30 | <b>SLEM</b> FPLL   |         |                    |
| vr1-L14 | <b>GLF</b> PFLVLL  | vr1-L31 | <b>TLRH</b> FPLL   |         |                    |
| vr1-L15 | IL <b>MC</b> FLDLL | vr1-L32 | <b>MLA</b> PFLLLL  |         |                    |

The mismatches are in bold.

**Supplementary Table S4.** The HLA genotyping information of PBMC from health donors.

| No. | HLA-A genotype                    | No. | HLA-A genotype                  |
|-----|-----------------------------------|-----|---------------------------------|
| #1  | HLA-A*11:01:01 / A*33:03:01:01    | #16 | HLA-A*02:06 / A*24:02:01G       |
| #2  | HLA-A*11:01:01 / A*11:01:01       | #17 | HLA-A*2:01:01 / A*32:01:01:01   |
| #3  | HLA-A*2:01:01 / A*02:05:01:01     | #18 | HLA-A*02:06:01 / A*33:03:01:01  |
| #4  | HLA-A*02:01:00 / A*68:02:00       | #19 | HLA-A*02:01:01 / A*02:07:01     |
| #5  | HLA-A*11:01:01 / A*33:03:01:01    | #20 | HLA-A*11:01:01 / A*33:03:01:01  |
| #6  | HLA-A*02:01:01 / A*32:01:01:01    | #21 | HLA-A*11:01:01 / A*24:02:01G    |
| #7  | HLA-A*02:07:01 / A*02:07:01       | #22 | HLA-A*02:01:01 / A*30:01:01:01  |
| #8  | HLA-A*11:01:01 / A*11:263         | #23 | HLA-A*11:01:01 / A*24:02:01G    |
| #9  | HLA-A*02:03:01 / A*68:01:02       | #24 | HLA-A*11:01:01 / A*24:02:01G    |
| #10 | HLA-A*01:01:01:01 / A*11:01:01    | #25 | HLA-A*02:07:01 / A*11:01:01     |
| #11 | HLA-A*24:02:01G / A*33:03:01:01   | #26 | HLA-A*02:03:01 / A*02:07:01     |
| #12 | HLA-A*02:03:01 / A*24:02:01G      | #27 | HLA-A*11:01:01 / A*24:02:01G    |
| #13 | HLA-A*11:01:01 / A*11:263         | #28 | HLA-A*02:01 / A*24:02:01G       |
| #14 | HLA-A*01:01:01:01 / A*24:03:01:01 | #29 | HLA-A*24:21:01G / A*31:01:02:01 |
| #15 | HLA-A*02:07:01 / A*03:01:01:01    | #30 | HLA-A*02:01:01 / A*02:07:01     |

**Supplementary Table S5.** Human normal primary cells (Sciencell) used for verifying the specificity of TCR15-T.

| Cell line | Abbreviation | Culture Medium | HLA-A genotype |
|-----------|--------------|----------------|----------------|
|           |              |                |                |

|                                     |        |                                  |          |                                |
|-------------------------------------|--------|----------------------------------|----------|--------------------------------|
| Human Bronchial Smooth Muscle Cells | HBSMC  | SMCM (Smooth Muscle Cell Medium) | HBSMC-A  | A*11:01:01:01<br>A*30:01:01    |
|                                     |        |                                  | HBSMC-B  | A*11:01:01:01<br>A*30:01:01    |
| Human Aortic Smooth Muscle Cells    | HASMC  | SMCM (Smooth Muscle Cell Medium) | HASMC-A  | A*11:01:01:01<br>A*24:02:01:01 |
|                                     |        |                                  | HASMC-B  | A*02:01:01:01<br>A*03:01:01:01 |
| Human Meningeal Cells               | HMC    | MCM (Meningeal Cell Medium)      | HMC-A    | A*02:01:01:01<br>A*02:01:01:01 |
|                                     |        |                                  | HMC-B    | ND                             |
| Human Renal Mesangial Cells         | HRMC   | MCM (Meningeal Cell Medium)      | HRMC-A   | A*02:01:01:01<br>A*30:01:01:01 |
|                                     |        |                                  | HRMC-B   | A*01:01:01:01<br>A*11:01:01:01 |
| Human Gastric Smooth Muscle Cells   | HGSMC  | SMCM (Smooth Muscle Cell Medium) | HGSMC-A  | A*23:01:01<br>A*80:01:01:01    |
|                                     |        |                                  | HGSMC-B  | A*02:01:01:01<br>A*32:01:01    |
| Human Renal Epithelial Cells        | HREpiC | EpiCM (Epithelial Cell Medium)   | HREpiC-A | A*02:01:01:01<br>A*32:01:01    |
|                                     |        |                                  | HREpiC-B | A*01:01:01:01<br>A*29:02:01:01 |

ND, none detected.

**Supplementary Table S6.** The EC<sub>50</sub> of the IFN- $\gamma$  release of vrt1-HBs371 pulsed T2 cells

incubated with TCR-T.

| TCR No. | EC <sub>50</sub> of IFN- $\gamma$ release (M) | Fold TCR0-T EC <sub>50</sub> |
|---------|-----------------------------------------------|------------------------------|
| TCR0-T  | 6.0E-09                                       | 1.0                          |
| TCR14-T | 1.6E-10                                       | 38.0                         |
| TCR15-T | 2.5E-10                                       | 24.0                         |
| TCR17-T | 8.2E-11                                       | 73.1                         |
| TCR19-T | 1.1E-11                                       | 527.8                        |

**Supplementary Table S7.** The EC<sub>50</sub> of the IFN- $\gamma$  release and LDH release of HBs370 or

HBs371 variants pulsed T2 cells incubated with TCR-T.

| EC <sub>50</sub> of peptide pulsed T2 | EC <sub>50</sub> of IFN- $\gamma$ release (M) |         | EC <sub>50</sub> of LDH release (M) |         |
|---------------------------------------|-----------------------------------------------|---------|-------------------------------------|---------|
|                                       | TCR0-T                                        | TCR15-T | TCR0-T                              | TCR15-T |
| vr1                                   | 7.4E-09                                       | 2.0E-10 | 3.7E-09                             | 2.9E-10 |
| vr2                                   | 6.7E-10                                       | 9.7E-11 | 4.7E-11                             | 4.4E-12 |
| vr3                                   | 9.3E-10                                       | 2.9E-10 | 2.0E-10                             | 4.4E-11 |
| vr4                                   | 0                                             | 0       | 0                                   | 0       |
| vr5                                   | 1.2E-10                                       | 6.4E-11 | 4.8E-11                             | 1.9E-11 |
| vr6                                   | ~8.0E-06                                      | 4.1E-09 | -                                   | 1.3E-10 |
| vr7                                   | 0                                             | 0       | 0                                   | 0       |
| vr8                                   | 0                                             | 0       | 0                                   | 0       |
| vr9                                   | 1.1E-07                                       | 5.1E-09 | 4.6E-08                             | 1.9E-09 |
| vr10                                  | 2.3E-09                                       | 3.6E-10 | 6.8E-10                             | 5.6E-11 |
| vr11                                  | 1.3E-08                                       | 1.3E-09 | 8.6E-09                             | 9.9E-11 |
| vr12                                  | 1.3E-08                                       | 2.0E-09 | 8.3E-10                             | 5.7E-11 |
| vr13                                  | 0                                             | 0       | 0                                   | 0       |
| vr14                                  | 5.5E-10                                       | 8.3E-11 | 1.3E-10                             | 1.5E-11 |
| vr0                                   | 7.8E-10                                       | 3.4E-10 | 4.3E-11                             | 1.2E-11 |
| vr16                                  | 0                                             | 0       | 0                                   | 0       |

**Supplementary Table S8.** Percentage of CD3 and CD8 positive T-cells in all cells of the tumor.

All pictures were taken under 400 $\times$ , scale bar, 90 $\mu$ m.

#### PBS

| Picture        | CD3 of PBS |      |      |      |      |      | CD8 of PBS |      |      |      |      |      |
|----------------|------------|------|------|------|------|------|------------|------|------|------|------|------|
|                | P1         | P2   | P3   | P4   | P5   | P6   | P1         | P2   | P3   | P4   | P5   | P6   |
| Positive cells | 0          | 0    | 0    | 0    | 0    | 0    | 0          | 0    | 0    | 0    | 0    | 0    |
| Total cells    | 1569       | 1760 | 1133 | 1351 | 1222 | 1478 | 1511       | 1691 | 1695 | 1372 | 1419 | 1689 |
| Positive rate% | 0.0        | 0.0  | 0.0  | 0.0  | 0.0  | 0.0  | 0.0        | 0.0  | 0.0  | 0.0  | 0.0  | 0.0  |
| Average%       | 0.0        |      |      |      |      |      | 0.0        |      |      |      |      |      |

#### TCR-A6-T ( $3.0 \times 10^7$ )

| Picture        | CD3 of TCR-A6-T ( $3.0 \times 10^7$ ) |      |      |      |      |      | CD8 of TCR-A6-T ( $3.0 \times 10^7$ ) |      |      |      |      |      |
|----------------|---------------------------------------|------|------|------|------|------|---------------------------------------|------|------|------|------|------|
|                | P1                                    | P2   | P3   | P4   | P5   | P6   | P1                                    | P2   | P3   | P4   | P5   | P6   |
| Positive cells | 21                                    | 26   | 14   | 15   | 23   | 15   | 0                                     | 0    | 0    | 0    | 0    | 0    |
| Total cells    | 1944                                  | 2440 | 2511 | 2604 | 2464 | 2461 | 2608                                  | 1811 | 1740 | 2116 | 2372 | 2420 |
| Positive rate% | 1.1                                   | 1.1  | 0.6  | 0.6  | 0.9  | 0.6  | 0.0                                   | 0.0  | 0.0  | 0.0  | 0.0  | 0.0  |
| Average%       | 0.8                                   |      |      |      |      |      | 0.0                                   |      |      |      |      |      |

#### TCR0-T ( $3.0 \times 10^7$ )

|                | CD3 of TCR0-T ( $3.0 \times 10^7$ ) |      |      |      |      |      | CD8 of TCR0-T ( $3.0 \times 10^7$ ) |      |      |      |      |      |
|----------------|-------------------------------------|------|------|------|------|------|-------------------------------------|------|------|------|------|------|
| Piture         | P1                                  | P2   | P3   | P4   | P5   | P6   | P1                                  | P2   | P3   | P4   | P5   | P6   |
| Positive cells | 188                                 | 248  | 175  | 187  | 190  | 151  | 88                                  | 57   | 62   | 81   | 5    | 83   |
| Total cells    | 1467                                | 1694 | 1588 | 1483 | 1650 | 1546 | 1388                                | 1686 | 1597 | 1428 | 1728 | 1576 |
| Positive rate% | 12.8                                | 14.6 | 11.0 | 12.6 | 11.5 | 9.8  | 6.3                                 | 3.4  | 3.9  | 5.7  | 0.3  | 5.3  |
| Average%       | 12.1                                |      |      |      |      |      | 4.1                                 |      |      |      |      |      |

TCR15-T ( $3.3 \times 10^6$ )

|                | CD3 of TCR15-T ( $3.3 \times 10^6$ ) |      |      |      |      |      | CD8 of TCR15-T ( $3.3 \times 10^6$ ) |      |      |      |      |      |
|----------------|--------------------------------------|------|------|------|------|------|--------------------------------------|------|------|------|------|------|
| Piture         | P1                                   | P2   | P3   | P4   | P5   | P6   | P1                                   | P2   | P3   | P4   | P5   | P6   |
| Positive cells | 449                                  | 528  | 606  | 352  | 582  | 271  | 264                                  | 274  | 393  | 425  | 280  | 112  |
| Total cells    | 1704                                 | 1632 | 1841 | 1634 | 2089 | 1920 | 2057                                 | 2123 | 1449 | 1686 | 1802 | 1504 |
| Positive rate% | 26.3                                 | 32.4 | 32.9 | 21.5 | 27.9 | 14.1 | 12.8                                 | 12.9 | 27.1 | 25.2 | 15.5 | 7.4  |
| Average%       | 25.9                                 |      |      |      |      |      | 16.8                                 |      |      |      |      |      |

TCR15-T ( $1.0 \times 10^7$ )

|                | CD3 of TCR15-T ( $1.0 \times 10^7$ ) |      |      |      |      |      | CD8 of TCR15-T ( $1.0 \times 10^7$ ) |      |      |      |      |      |
|----------------|--------------------------------------|------|------|------|------|------|--------------------------------------|------|------|------|------|------|
| Piture         | P1                                   | P2   | P3   | P4   | P5   | P6   | P1                                   | P2   | P3   | P4   | P5   | P6   |
| Positive cells | 1561                                 | 1627 | 1158 | 761  | 1274 | 510  | 1192                                 | 1121 | 1055 | 800  | 675  | 823  |
| Total cells    | 2278                                 | 2295 | 2222 | 1759 | 1742 | 1460 | 2570                                 | 2525 | 2462 | 2435 | 2526 | 2131 |
| Positive rate% | 68.5                                 | 70.9 | 52.1 | 43.3 | 73.1 | 34.9 | 46.4                                 | 44.4 | 42.9 | 32.9 | 26.7 | 38.6 |
| Average%       | 57.1                                 |      |      |      |      |      | 38.6                                 |      |      |      |      |      |
